# Supplementary material
Source: PubMed Central journal article supplement (PMC2526231)
Supplement: NIHMS62903-supplement-1File002.pdf [file NIHMS62903-supplement-1File002.pdf]

## Mechanistic and Structural Analyses of the Roles of Arg409 and Asp402 in the Reaction of the Flavoprotein Nitroalkane Oxidase<sup>†,‡</sup>

Paul F. Fitzpatrick,<sup>§,||,\*</sup> Dragana M. Bozinovski,<sup>§</sup> Annie Héroux,<sup>†</sup> Patrick G. Shaw,<sup>†</sup> Michael P. Valley,<sup>§</sup> and Allen M. Orville<sup>†,\*</sup>

<sup>§</sup>Departments of Biochemistry and Biophysics and of <sup>||</sup>Chemistry, Texas A&M University, College Station, TX 77843-2128

<sup>†</sup>Department of Biology, Brookhaven National Laboratory, Upton, New York 11973

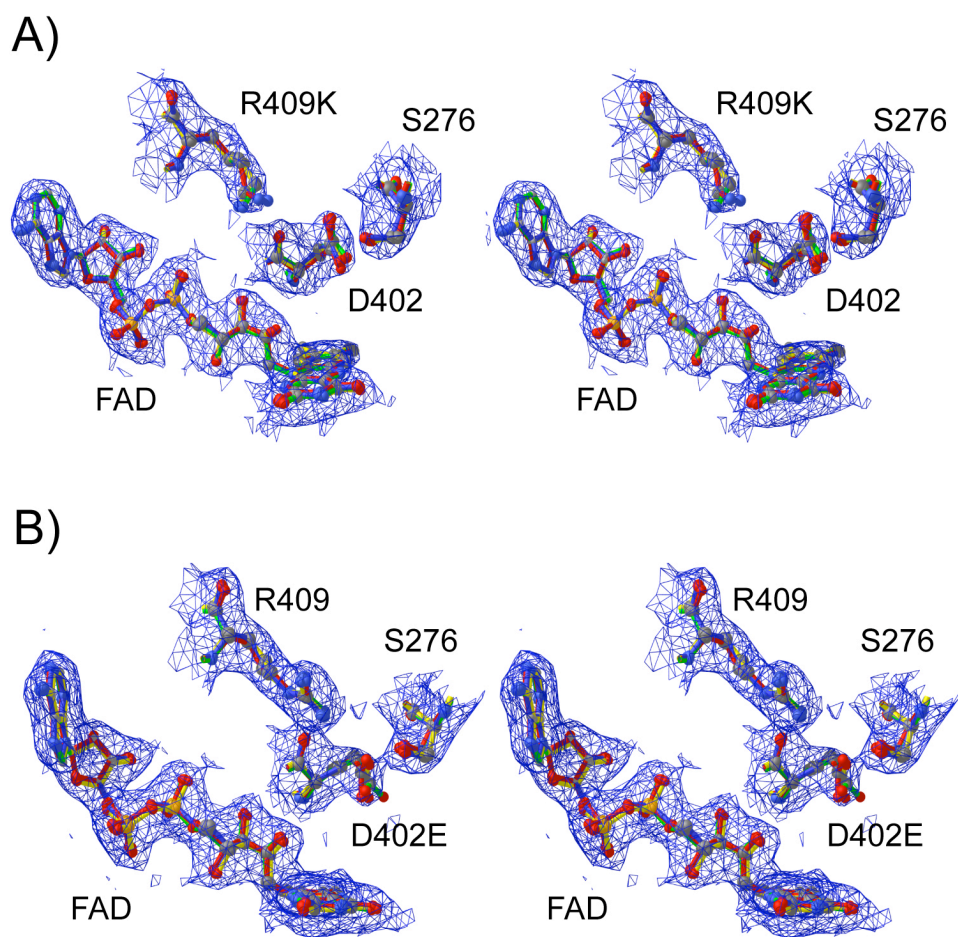

**Fig. S1:** Divergent stereo views of the NCS averaged electron density maps (1 $\sigma$ ) for (A) R409K and (B) D402E at 2.65 Å and 2.4 Å resolution, respectively. All four subunits are superimposed within the density with bonds shown in yellow, blue, green and red for subunits A,B,C,and D, respectively. Atoms are colored according to atom type.

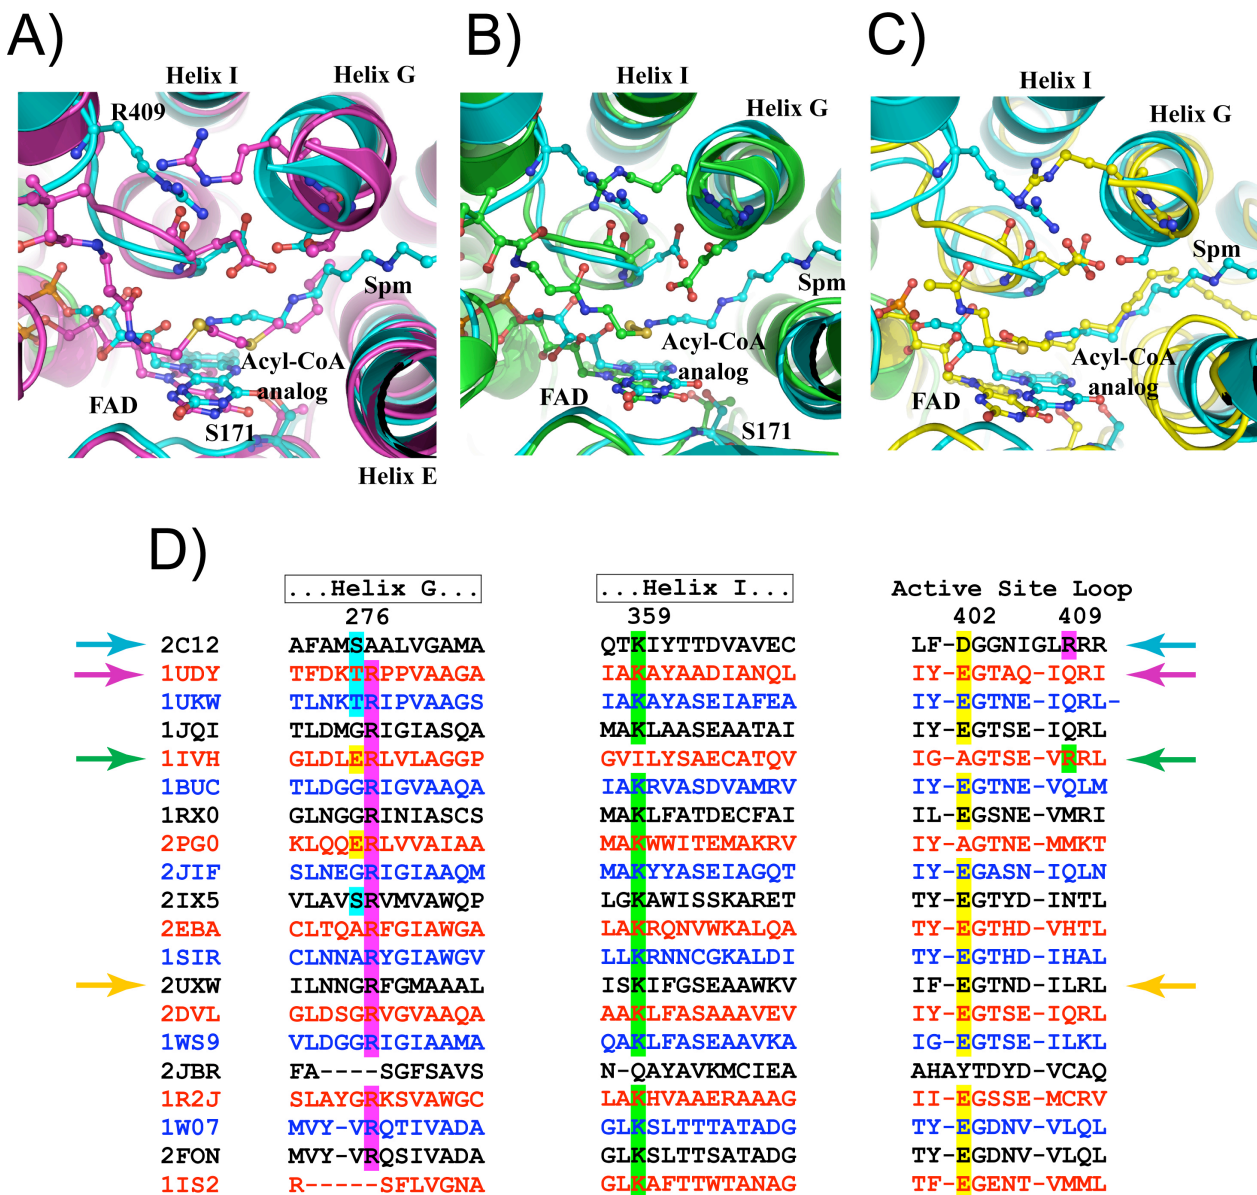

**Fig. S2:** Overlay of NAO and selected homologs. **A)** NAO (cyan, PDB code 2s12) superimposed with MCAD (magenta, PDB code 1udy); **B)** NAO superimposed with isovaleryl-CoA dehydrogenase (green, PDB code 1ivh); **C)** NAO superimposed with human very long chain Acyl-CoA dehydrogenase (yellow, PDB code 2uxw). Shaded boxes correspond to residues in NAO that occupy the equivalent 3-dimensional space as Ser276 (cyan), Arg409 (magenta), Lys359 (green) and the active site base Asp402 (yellow). **D)** The secondary structure alignment (from the SSM web-server) for 20 homologs in the active site region of NAO illustrated in parts A-C. The numbering scheme corresponds to that of NAO (2C12). The full PDB titles are given below.

2C12:A Crystal Structure of Nitroalkane Oxidase in Complex with Spermine, A Competitive Inhibitor  
 1UDY:A Medium-Chain Acyl-CoA Dehydrogenase with 3-Thiooctanoyl-CoA  
 1UKW:A Crystal structure of medium-chain acyl-CoA dehydrogenase from *Thermus thermophilus* HB8  
 1JQI:A Crystal Structure of Rat Short Chain Acyl-CoA Dehydrogenase Complexed with Acetoacetyl-CoA  
 1IVH:A Structure of Human Isovaleryl-CoA Dehydrogenase: Structural Basis for Substrate Specificity  
 1BUC:A Three-Dimensional Structure of Butyryl-CoA Dehydrogenase from *Megasphaera elsdenii*  
 1RX0:A Crystal structure of isobutyryl-CoA dehydrogenase complexed with substrate/ligand  
 2PG0:A Crystal structure of acyl-CoA dehydrogenase from *Geobacillus kaustophilus*  
 2JIF:A Structure Of Human Short-Branched Chain Acyl-CoA Dehydrogenase (ACADSB)  
 2IX5:A Short Chain Specific Acyl-CoA Oxidase from *Arabidopsis thaliana*, Acx4 in Complex with Acetoacetyl-CoA  
 2EBA:A Crystal structure of the putative glutaryl-CoA dehydrogenase from *Thermus thermophilus*  
 1SIR:A The Crystal Structure and Mechanism of Human Glutaryl-CoA Dehydrogenase  
 2UXW:A Crystal Structure of Human Very Long Chain Acyl-CoA Dehydrogenase (ACADVL)  
 2DVL:A Crystal structure of project TT0160 from *Thermus thermophilus* HB8  
 1WS9:A Crystal structure of project ID TT0172 from *Thermus thermophilus* HB8  
 2JBR:A Monooxygenase Component of *p*-Hydroxyphenylacetate Hydroxylase from *Acinetobacter baumannii*  
 1R2J:A Fkbl for Biosynthesis of Methoxymalonyl Extender Unit of Fk520 Polyketide Immunosuppressant  
 1W07:A *Arabidopsis thaliana* Acyl-Coa Oxidase 1  
 2FON:A X-ray crystal structure of LeACX1, an acyl-CoA oxidase from *Lycopersicon esculentum* (tomato)  
 1IS2:A Crystal Structure of Peroxisomal Acyl-CoA Oxidase-II from Rat Liver
